# Supplementary material
Source: HighWire-hosted journal article supplement (https://hw-f5-jim.highwire.org/content/jim-2021-002099)
Supplement: inline-supplementary-material-1 [file inline-supplementary-material-1.pdf]

| Pt | Age | Sex | Malignancy    | ICI*                         | Time to onset (mo) | Mass effects             | Pituitary hormone deficiencies |
|----|-----|-----|---------------|------------------------------|--------------------|--------------------------|--------------------------------|
| 1  | 78  | M   | Melanoma      | Ipilimumab → Pembrolizumab   | 2.6                | Headache                 | ACTH**, TSH***                 |
| 2  | 44  | F   | Melanoma      | Ipilimumab                   | 1.9                | Headache                 | ACTH**, TSH***                 |
| 3  | 48  | F   | Melanoma      | Ipilimumab                   | 2.2                | Headache                 | ACTH**, Prolactin              |
| 4  | 67  | M   | Melanoma      | Ipilimumab → Pembrolizumab   | 15.6               | Absent                   | ACTH**, TSH***                 |
| 5  | 56  | M   | Melanoma      | Ipilimumab → Pembrolizumab   | 1.0                | Headache                 | ACTH**, Gonadotropins          |
| 6  | 65  | M   | Melanoma      | Ipilimumab → Pembrolizumab   | 11.1               | Absent                   | ACTH**                         |
| 7  | 65  | M   | Melanoma      | Ipilimumab → Pembrolizumab   | 3.0                | Absent                   | ACTH**, TSH***, Gonadotropins  |
| 8  | 60  | M   | Melanoma      | Ipilimumab                   | 1.5                | Headache                 | ACTH**, TSH**                  |
| 9  | 67  | M   | Head and neck | Pembrolizumab                | 5.1                | Absent                   | ACTH**                         |
| 10 | 57  | M   | Melanoma      | Pembrolizumab                | 4.6                | Absent                   | ACTH**, Gonadotropins          |
| 11 | 56  | M   | Melanoma      | Ipilimumab → Pembrolizumab   | 2.8                | Headache                 | ACTH**                         |
| 12 | 47  | F   | Melanoma      | Ipilimumab                   | 2.9                | Absent                   | ACTH**, Gonadotropins          |
| 13 | 71  | M   | Melanoma      | Ipilimumab                   | 2.7                | Headache                 | ACTH**, TSH***                 |
| 14 | 63  | F   | Breast        | Pembrolizumab                | 3.4                | Absent                   | ACTH**, TSH***                 |
| 15 | 42  | F   | Melanoma      | Pembrolizumab                | 8.9                | Absent                   | ACTH**, TSH***                 |
| 16 | 64  | F   | Melanoma      | Ipilimumab and Nivolumab     | 2.1                | Headache                 | ACTH**, TSH***, GH****         |
| 17 | 56  | F   | Melanoma      | Ipilimumab                   | 14.0               | Absent                   | ACTH**                         |
| 18 | 67  | M   | Melanoma      | Pembrolizumab                | 7.9                | Absent                   | ACTH**                         |
| 19 | 58  | F   | Lung          | Ipilimumab and Nivolumab     | 4.9                | Headache                 | ACTH**                         |
| 20 | 56  | M   | Melanoma      | Ipilimumab                   | 4.0                | Absent                   | ACTH**                         |
| 21 | 56  | F   | Melanoma      | Ipilimumab → Pembrolizumab   | 17.7               | Absent                   | ACTH**                         |
| 22 | 56  | F   | Melanoma      | Ipilimumab                   | 2.9                | Headache                 | ACTH**, TSH***, Prolactin      |
| 23 | 55  | M   | Melanoma      | Pembrolizumab                | 1.3                | Headache, visual deficit | ACTH**                         |
| 24 | 57  | F   | Head and neck | Pembrolizumab f/b Ipilimumab | 9.8                | Absent                   | ACTH**                         |
| 25 | 68  | M   | Melanoma      | Pembrolizumab                | 1.2                | Diplopia                 | ACTH**                         |
| 26 | 67  | F   | Esophageal    | Ipilimumab and Nivolumab     | 2.3                | Headache, diplopia       | ACTH**                         |

Supplemental Table 1: Individual characteristics of ICI induced hypophysitis patients. \*ICI: immune checkpoint inhibitor; \*\*ACTH: adrenocorticotrophic hormone; \*\*\*TSH: thyroid stimulating hormone; \*\*\*\*GH: growth hormone
