# Supplementary material
Source: HighWire-hosted journal article supplement (https://hw-f5-jim.highwire.org/content/jim-2021-002099)
Supplement: inline-supplementary-material-2 [file inline-supplementary-material-2.pdf]

| <b>Predictors for overall survival</b> | <b>Hazard ratio for mortality (95% CI)</b> | <b>p value</b> |
|----------------------------------------|--------------------------------------------|----------------|
| Hypophysitis                           | 0.52 (0.28 to 0.99)                        | 0.0358         |
| Age at ICI* initiation (y)             | 2.55 (1.53 to 4.26)                        | 0.0003         |
| Males                                  | 1.07 (0.89 to 1.29)                        | 0.4402         |
| Malignancy                             |                                            | <0.0001        |
| • Lung vs leukemia/lymphoma            | 1.72 (1.28 to 2.30)                        | 0.0003         |
| • Lung vs melanoma                     | 1.69 (1.33 to 2.14)                        | <0.0001        |
| • Lung vs other**                      | 1.06 (0.83 to 1.37)                        | 0.6219         |
| • Leukemia/lymphoma vs other**         | 0.62 (0.47 to 0.81)                        | 0.0005         |
| • Leukemia/lymphoma vs melanoma        | 0.98 (0.76 to 1.26)                        | 0.8718         |
| • Melanoma vs other**                  | 0.63 (0.51 to 0.78)                        | <0.0001        |

Supplemental Table 2: Predictors for overall survival in ICI treated cancer patients. \*ICI:

immune checkpoint inhibitor; \*\*other: combination of various malignancies with n<100.
